# Supplementary material for: A Portable Diagnostic Assay, Genetic Diversity, and Isolation of Seoul Virus from Rattus norvegicus Collected in Gangwon Province, Republic of Korea
Source: MDPI journal article supplement (doi:10.3390/pathogens11091047), 2022-09-14
Supplement: s1 [file s1]

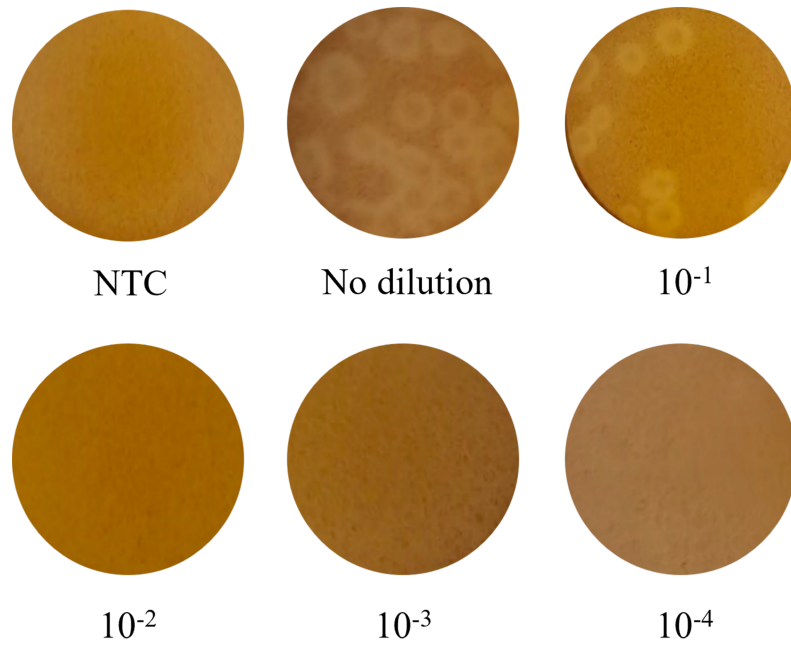

**Figure S2. The plaque assay of SEOV Rn19-5 strain.** SEOV Rn19-5 strain was quantified on 6-well plates with Vero E6 monolayers. Each well indicates different dilutions from top-left to right: NTC, no dilution, and dilutions at  $1:10^1$ , and bottom-left to right: dilutions at  $1:10^2$ ,  $1:10^3$ , and  $1:10^4$ , respectively. The plaque was first observed at 9 days post infection. SEOV, Seoul virus; NTC, negative control.
