# Supplementary material for: A Portable Diagnostic Assay, Genetic Diversity, and Isolation of Seoul Virus from Rattus norvegicus Collected in Gangwon Province, Republic of Korea
Source: MDPI journal article supplement (doi:10.3390/pathogens11091047), 2022-09-14
Supplement: s1 [file s1]

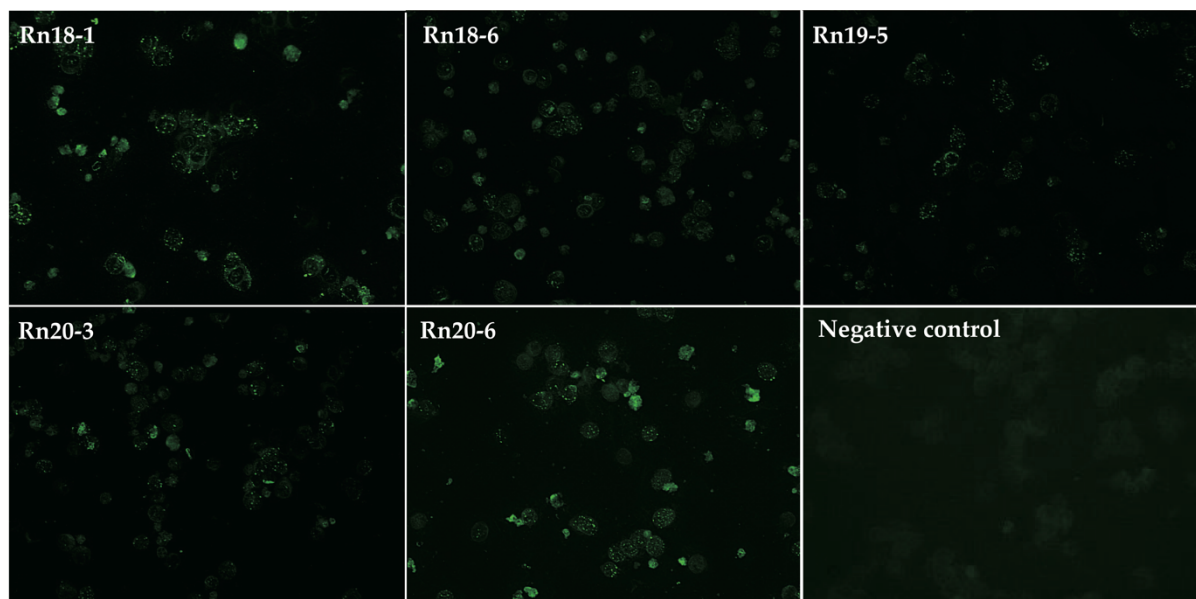

**Figure S1. Detection of immunoglobulin G (IgG) antibodies against Seoul virus (SEOV) from heart fluids of *Rattus norvegicus* by indirect immunofluorescence assay (IFA).** SEOV-infected Vero E6 cells were fixed on each slide. The heart fluids (1:2 dilution) of dead rats were used to detect anti-SEOV IgG by IFA, Rn18-1, Rn18-6, Rn19-5, Rn20-3, and Rn20-6. Negative control used was phosphate buffered saline (PBS). Rn, *R. norvegicus*.
