# Supplementary material for: A Portable Diagnostic Assay, Genetic Diversity, and Isolation of Seoul Virus from Rattus norvegicus Collected in Gangwon Province, Republic of Korea
Source: MDPI journal article supplement (doi:10.3390/pathogens11091047), 2022-09-14
Supplement: s1 [file s1]

Table S2. Summary of mapped reads and depth of coverage for Seoul virus using next-generation sequencing in this study.

| Sample      | Total reads | Mapped reads/<br>Total reads (%) | L segment                        |                      | M segment                        |                      | S segment                        |                      |
|-------------|-------------|----------------------------------|----------------------------------|----------------------|----------------------------------|----------------------|----------------------------------|----------------------|
|             |             |                                  | Reads mapped<br>to reference (%) | Depth of<br>coverage | Reads mapped<br>to reference (%) | Depth of<br>coverage | Reads mapped<br>to reference (%) | Depth of<br>coverage |
| Rn18-1      | 2,057,486   | 1,023,268 (49.7)                 | 117,462 (11.5)                   | 2,076.0              | 426,755 (41.7)                   | 12,578.9             | 479,051 (46.8)                   | 27,824.2             |
| Rn19-5      | 6,589,296   | 6,326,623 (96.0)                 | 2,080,167 (32.9)                 | 38,615.5             | 2,227,049 (35.2)                 | 73,719.6             | 2,019,407 (31.9)                 | 137,705.4            |
| Average (%) | 4,323,391   | 3,674,946 (85.0)                 | 1,098,815 (29.9)                 | 20,345.7             | 1,326,902 (36.1)                 | 43,149.2             | 1,249,229 (34.0)                 | 82,764.8             |

Rn, *Rattus norvegicus*; L, large; M, medium; S, small.

The depth of coverage was calculated using the number of mapped reads (read length × number of reads matching the reference/reference genome size).
