# Supplementary material for: A Portable Diagnostic Assay, Genetic Diversity, and Isolation of Seoul Virus from Rattus norvegicus Collected in Gangwon Province, Republic of Korea
Source: MDPI journal article supplement (doi:10.3390/pathogens11091047), 2022-09-14
Supplement: s1 [file s1]

**Table S1. Trapping sites and GPS coordinates in this study.**

| Year | Trapping site                          | GPS coordinates          |
|------|----------------------------------------|--------------------------|
| 2016 | Seoul Metropolitan City (Yongdu-dong)  | 37°34'42" N 127°01'45" E |
|      | Seoul Metropolitan City (Anam-dong)    | 37°34'58" N 127°01'45" E |
|      | Seoul Metropolitan City (Sinseol-dong) | 37°34'32" N 127°01'25" E |
| 2017 | Seoul Metropolitan City (Yongdu-dong)  | 37°34'42" N 127°01'45" E |
|      | Seoul Metropolitan City (Anam-dong)    | 37°34'58" N 127°01'45" E |
| 2018 | Chuncheon-si (Cheonjeon-ri)            | 37°56'34" N 127°46'34" E |
| 2019 | Gangneung-si (Haksan-ri)               | 37°42'51" N 128°53'52" E |
| 2020 | Seoul Metropolitan City (Anam-dong)    | 37°34'58" N 127°01'45" E |
|      | Cheorwon-gun (Yuli-ri)                 | 38°14'16" N 127°12'3" E  |
